# Supplementary material
Source: PubMed Central journal article supplement (PMC8406682)
Supplement: NIHMS1546064-supplement-1.pdf [file NIHMS1546064-supplement-1.pdf]

## Supplemental Data

### Vinopocetine suppresses *Streptococcus pneumoniae*-induced inflammation via inhibition of ERK1 by CYLD

Kensei Komatsu, Dae-Hwan Nam, Ji-Yun Lee, Go Yoneda, Chen Yan, and Jian-Dong Li

#### Supplemental Figure 1

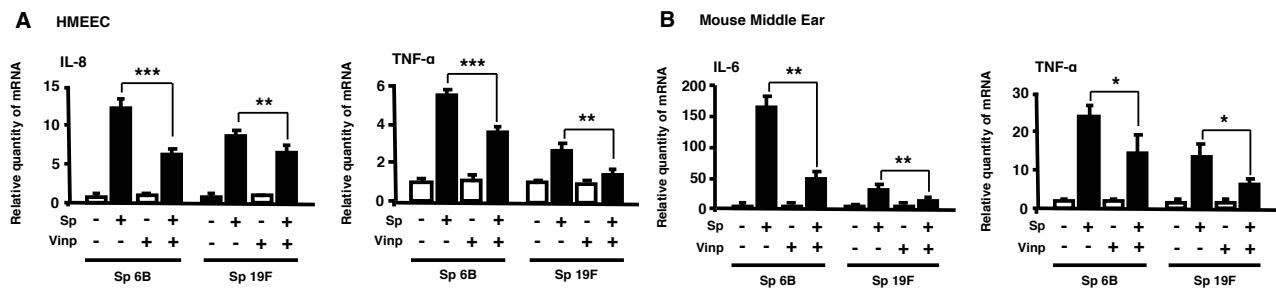

#### Supplemental Figure 1. Vinopocetine suppresses *S. pneumoniae* 6B, 19F-induced inflammatory response *in vitro* and *in vivo*.

(A) Human middle ear epithelial cells HMEEC were pre-treated with vinopocetine (10  $\mu$ M) for 1 h, followed by stimulation with *S. pneumoniae* 6B, 19F for 6 h. Relative quantity of IL-8 and TNF- $\alpha$  mRNA expression was measured by real-time Q-PCR analysis. (B) Mice were pre-treated with vinopocetine (10 mg/kg, i.p.) for 2 h and inoculated transtympanically with *S. pneumoniae* 6B, 19F ( $5 \times 10^6$  CFU per mouse) for 9 h. IL-6 and TNF- $\alpha$  mRNA expression in the middle ear of mice was measured by real-time Q-PCR analysis. Data are mean  $\pm$  SD ( $n = 3$ ). \* $p < 0.05$ , \*\* $p < 0.01$ , \*\*\* $p < 0.001$ . Statistical analysis was performed using Student's *t*-test. Data are representative of three or more independent experiments. Sp, *S. pneumoniae*. Vinp, vinopocetine.

**Supplemental Table 1. Primers for real-time quantitative RT-PCR (Q-PCR) analysis**

| <b>Primer name</b>  | <b>Forward (5'-3')</b>    | <b>Reverse (5'-3')</b>     |
|---------------------|---------------------------|----------------------------|
| human IL-1 $\beta$  | AAACAGATGAAGTGCTCCTTCCAGG | CTGTCCATGGCCACAACAACACTGAC |
| human IL-6          | AAATTCGGTACATCCTCGACGGCA  | AGTGCCTCTTGCTGCTTTCACAC    |
| human IL-8          | TCCTGATTTCTGCAAGCTCTG     | GTCCACTCTCAATCACTCTCAG     |
| human TNF- $\alpha$ | CCCAGGCAGTCAGATCATCTT     | AGCTGCCCCTCAGCTTGA         |
| human CYLD          | GTTGACTCACAACCACAATCC     | GTGAAGAACGGTCAAAGTCTGTAG   |
| human Cyclophilin A | CGGGTCCTGGCATCTTGT        | GCAGATGAAAACTGGGAACCA      |
| mouse IL-1 $\beta$  | CAACCAACAAGTGATATTCTCCATG | GATCCACACTCTCCAGCTGCA      |
| mouse IL-6          | GAGGATACCACTCCCAACAGACC   | AAGTGCATCATCGTTGTTTCATACA  |
| mouse MIP-2         | CCTGCCAAGGGTTGACTTCA      | TTCTGTCTGGGCGCAGTG         |
| mouse TNF- $\alpha$ | CATCTTCTCAAAATTCGAGTGACAA | TGGGAGTAGACAAGGTACAACCC    |
| mouse CYLD          | CCTGGCTTTTCTTTGACAGC      | AAGAGTGCAGGTCTCCAGA        |
| mouse GAPDH         | ACCCAGAAGACTGTGGATGG      | GGATGCAGGGATGATGTTCT       |
